# Supplementary material
Source: publisher site journal article supplement (https://www.dovepress.com/article/348981)
Supplement: Supplementary file 1 [file get_supplementary_file.php]

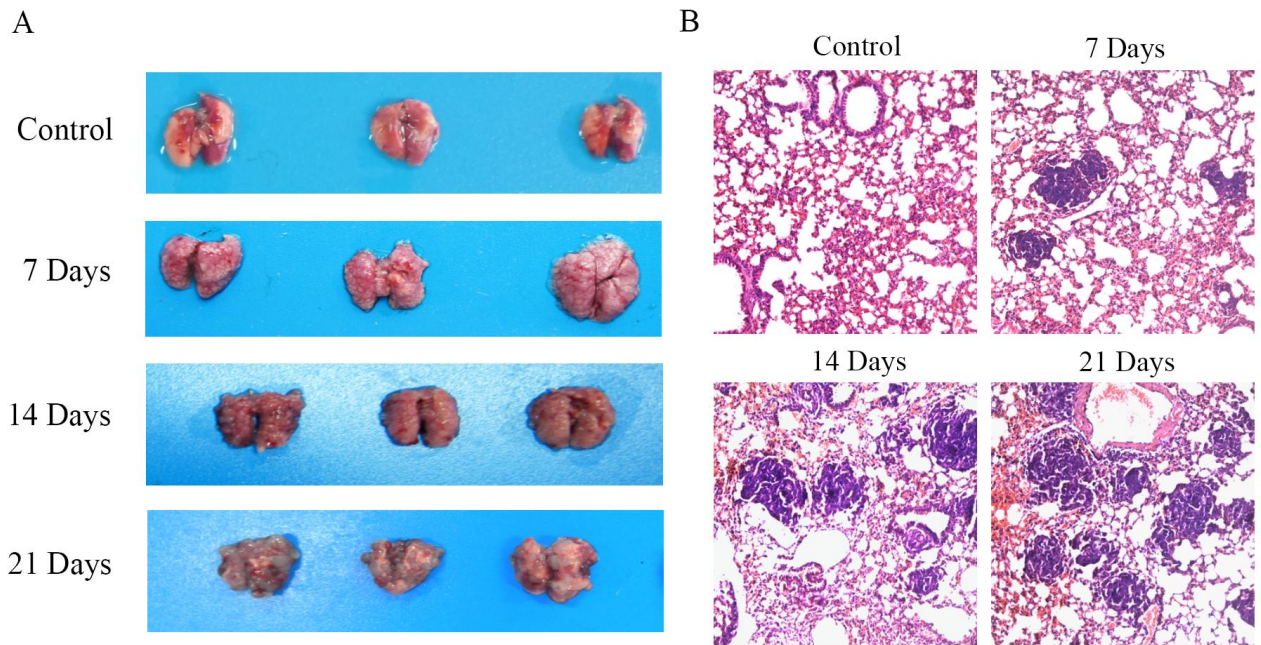

Supplement Figure. Verification of the colorectal cancer lung metastasis model

A. Images of lung tissues dissected from mice of different groups; B. HE staining of lung tissues of different groups.
